# Supplementary material
Source: HighWire-hosted journal article supplement (doi:10.1101/rna.079389.122)
Supplement: Supplemental_Legends.docx [file Supplemental_Legends.docx]

**SUPPLEMENTAL DATA**

**Fig. S1** reports the Exacerbated Pause Sites (EPS) on A6 and COIII after RESC13 and RESC14 RNAi. **Fig. S2** shows the sites where sequences with junction lengths >20 increase after RESC13 RNAi on COIII and RPS12. **Table S1** shows the total fragments and unique sequences in the partially edited A6 and COIII sequence libraries. **Tables S2 and S3** report the determination of EPSs on A6 and COIII after RESC13 and RESC14 RNAi.
