# Supplementary material
Source: HighWire-hosted journal article supplement (doi:10.1101/rna.079389.122)
Supplement: Supplemental_Tables_S1_S2_S3.xlsx [file Supplemental_Tables_S1_S2_S3.xlsx]

## Sheet: Table S1
Table S1. Total fragments and unique sequences in the partially edited A6 and COIII sequence libraries.
Breakdown of each wild type (29-13), RESC13 and RESC14 RNAi deep sequencing sample used in this study. Standard alignments (i.e. no non-T insertions, deletions or SNPs) and non-standard (i.e. with non-T errors) with a breakdown of the number of mismatches within the non-standard sequences (1, 2, >3) are shown. (A) A6 fragments (decollapsed). (B) A6 unique (collapsed) sequences. (C) COIII fragment…
A) A6 Fragments											B) A6 Unique Sequences
Cell type	Replicate	Induction	Standard Alignments	Non-Standard	1-Mismatch	2-Mismatch	>3-Mismatch	Indels	Total		Cell type	Replicate	Induction	Standard Alignments	Non-Standard	1-Mismatch	2-Mismatch	>3-Mismatch	Indels	Total
A6 29-13	1	-	357431 (84.89%)	63639 (15.11%)	8231 (1.95%)	275 (0.07%)	40 (0.01%)	55093 (13.08%)	421070		A6 29-13	1	-	74449 (59.70%)	50258 (40.30%)	6002 (4.81%)	265 (0.21%)	40 (0.03%)	43951 (35.24%)	124707
A6 29-13	2	-	437166 (84.71%)	78895 (15.29%)	9977 (1.93%)	296 (0.06%)	46 (0.01%)	68576 (13.29%)	516061		A6 29-13	2	-	89161 (58.72%)	62688 (41.28%)	7355 (4.84%)	290 (0.19%)	46 (0.03%)	54997 (36.22%)	151849
A6 29-13	3	-	411371 (83.81%)	79477 (16.19%)	9263 (1.89%)	259 (0.05%)	36 (0.01%)	69919 (14.24%)	490848		A6 29-13	3	-	85888 (58.35%)	61318 (41.65%)	6740 (4.58%)	252 (0.17%)	36 (0.02%)	54290 (36.88%)	147206
A6 29-13	4	-	380435 (82.99%)	77985 (17.01%)	8619 (1.88%)	259 (0.06%)	53 (0.01%)	69054 (15.06%)	458420		A6 29-13	4	-	86353 (58.64%)	60919 (41.36%)	6459 (4.39%)	250 (0.17%)	52 (0.04%)	54158 (36.77%)	147272
A6 29-13	5	-	225350 (84.30%)	41959 (15.70%)	4990 (1.87%)	122 (0.05%)	24 (0.01%)	36823 (13.78%)	267309		A6 29-13	5	-	54881 (61.24%)	34734 (38.76%)	4039 (4.51%)	122 (0.14%)	24 (0.03%)	30549 (34.09%)	89615
RESC13 RNAi	1	-	136726 (83.05%)	27900 (16.95%)	3159 (1.92%)	89 (0.05%)	20 (0.01%)	24632 (14.96%)	164626		RESC13 RNAi	1	-	34351 (59.22%)	23653 (40.78%)	2628 (4.53%)	87 (0.15%)	20 (0.03%)	20918 (36.06%)	58004
RESC13 RNAi	2	-	162867 (82.28%)	35080 (17.72%)	3764 (1.90%)	110 (0.06%)	20 (0.01%)	31186 (15.75%)	197947		RESC13 RNAi	2	-	40120 (58.51%)	28450 (41.49%)	3005 (4.38%)	108 (0.16%)	20 (0.03%)	25317 (36.92%)	68570
RESC13 RNAi	1	+	247109 (85.22%)	42873 (14.78%)	5441 (1.88%)	202 (0.07%)	27 (0.01%)	37203 (12.83%)	289982		RESC13 RNAi	1	+	59997 (63.99%)	33762 (36.01%)	4251 (4.53%)	197 (0.21%)	27 (0.03%)	29287 (31.24%)	93759
RESC13 RNAi	2	+	208779 (84.77%)	37522 (15.23%)	4805 (1.95%)	174 (0.07%)	31 (0.01%)	32512 (13.20%)	246301		RESC13 RNAi	2	+	53089 (63.72%)	30228 (36.28%)	3856 (4.63%)	171 (0.21%)	31 (0.04%)	26170 (31.41%)	83317
RESC14 RNAi	1	-	464334 (81.66%)	104268 (18.34%)	12264 (2.16%)	643 (0.11%)	151 (0.03%)	91210 (16.04%)	568602		RESC14 RNAi	1	-	88798 (53.18%)	78185 (46.82%)	7697 (4.61%)	598 (0.36%)	150 (0.09%)	69740 (41.76%)	166983
RESC14 RNAi	2	-	424425 (82.03%)	93006 (17.97%)	11197 (2.16%)	653 (0.13%)	154 (0.03%)	81002 (15.65%)	517431		RESC14 RNAi	2	-	76632 (53.81%)	65774 (46.19%)	7187 (5.05%)	602 (0.42%)	154 (0.11%)	57831 (40.61%)	142406
RESC14 RNAi	1	+	357389 (84.61%)	65020 (15.39%)	9253 (2.19%)	491 (0.12%)	136 (0.03%)	55140 (13.05%)	422409		RESC14 RNAi	1	+	47406 (51.93%)	43891 (48.07%)	5051 (5.53%)	451 (0.49%)	136 (0.15%)	38253 (41.90%)	91297
RESC14 RNAi	2	+	387897 (85.07%)	68082 (14.93%)	9679 (2.12%)	548 (0.12%)	147 (0.03%)	57708 (12.66%)	455979		RESC14 RNAi	2	+	46338 (49.57%)	47133 (50.43%)	5321 (5.69%)	505 (0.54%)	147 (0.16%)	41160 (44.04%)	93471
		Total:	4201279	815706	100642	4121	885	710058	5016985				Total:	837463	620993	69591	3898	883	942185	1458456
C) COIII Fragments											D) COIII Unique Sequences
Cell type	Replicate	Induction	Standard Alignments	Non-Standard	1-Mismatch	2-Mismatch	>3-Mismatch	Indels	Total		Cell type	Replicate	Induction	Standard Alignments	Non-Standard	1-Mismatch	2-Mismatch	>3-Mismatch	Indels	Total
COIII 29-13	1	-	194836 (73.28%)	71025 (26.72%)	6831 (2.57%)	206 (0.08%)	34 (0.01%)	63954 (24.06%)	265861		COIII 29-13	1	-	124400 (66.01%)	64062 (33.99%)	6201 (3.29%)	206 (0.11%)	34 (0.02%)	57621 (30.57%)	188462
COIII 29-13	2	-	165476 (73.78%)	58804 (26.22%)	5919 (2.64%)	169 (0.08%)	27 (0.01%)	52689 (23.49%)	224280		COIII 29-13	2	-	104405 (66.35%)	52954 (33.65%)	5315 (3.38%)	169 (0.11%)	27 (0.02%)	47443 (30.15%)	157359
COIII 29-13	3	-	192414 (73.56%)	69153 (26.44%)	6898 (2.64%)	212 (0.08%)	34 (0.01%)	62009 (23.71%)	261567		COIII 29-13	3	-	121197 (66.10%)	62151 (33.90%)	6202 (3.38%)	211 (0.12%)	34 (0.02%)	55704 (30.38%)	183348
COIII 29-13	4	-	104506 (72.89%)	38870 (27.11%)	3678 (2.57%)	107 (0.07%)	14 (0.01%)	35071 (24.46%)	143376		COIII 29-13	4	-	69837 (66.26%)	35557 (33.74%)	3388 (3.21%)	107 (0.10%)	14 (0.01%)	32048 (30.41%)	105394
COIII 29-13	5	-	197533 (73.64%)	70726 (26.36%)	6974 (2.60%)	212 (0.08%)	14 (0.01%)	63526 (23.68%)	268259		COIII 29-13	5	-	125381 (66.35%)	63598 (33.65%)	6298 (3.33%)	210 (0.11%)	14 (0.01%)	57076 (30.20%)	188979
RESC13 RNAi	1	-	216484 (84.83%)	38722 (15.17%)	4888 (1.92%)	146 (0.06%)	33 (0.01%)	33655 (13.19%)	255206		RESC13 RNAi	1	-	106054 (74.18%)	36919 (25.82%)	4355 (3.05%)	144 (0.10%)	33 (0.02%)	32387 (22.65%)	142973
RESC13 RNAi	2	-	203469 (84.48%)	37389 (15.52%)	4527 (1.88%)	175 (0.07%)	27 (0.01%)	32660 (13.56%)	240858		RESC13 RNAi	2	-	101612 (73.95%)	35802 (26.05%)	4046 (2.94%)	173 (0.13%)	27 (0.02%)	31556 (22.96%)	137414
RESC13 RNAi	1	+	221697 (82.92%)	45657 (17.08%)	5020 (1.88%)	178 (0.07%)	43 (0.02%)	40416 (15.12%)	267354		RESC13 RNAi	1	+	154228 (77.89%)	43775 (22.11%)	4698 (2.37%)	176 (0.09%)	43 (0.02%)	38858 (19.62%)	198003
RESC13 RNAi	2	+	218244 (82.22%)	47190 (17.78%)	4933 (1.86%)	180 (0.07%)	33 (0.01%)	42044 (15.84%)	265434		RESC13 RNAi	2	+	161218 (78.04%)	45356 (21.96%)	4681 (2.27%)	180 (0.09%)	33 (0.02%)	40462 (19.59%)	206574
RESC14 RNAi	1	-	390615 (80.25%)	96136 (19.75%)	9347 (1.92%)	388 (0.08%)	89 (0.02%)	86312 (17.73%)	486751		RESC14 RNAi	1	-	183535 (68.14%)	85833 (31.86%)	7719 (2.87%)	384 (0.14%)	89 (0.03%)	77641 (28.82%)	269368
RESC14 RNAi	2	-	389615 (78.68%)	105553 (21.32%)	9921 (2.00%)	476 (0.10%)	106 (0.02%)	95050 (19.20%)	495168		RESC14 RNAi	2	-	188872 (66.77%)	94016 (33.23%)	8093 (2.86%)	469 (0.17%)	105 (0.04%)	85349 (30.17%)	282888
RESC14 RNAi	1	+	435853 (82.58%)	91912 (17.42%)	12278 (2.33%)	693 (0.13%)	154 (0.03%)	78787 (14.93%)	527765		RESC14 RNAi	1	+	135398 (64.95%)	73067 (35.05%)	7597 (3.64%)	643 (0.31%)	153 (0.07%)	64674 (31.02%)	208465
RESC14 RNAi	2	+	284871 (83.83%)	54937 (16.17%)	7888 (2.32%)	411 (0.12%)	93 (0.03%)	46545 (13.70%)	339808		RESC14 RNAi	2	+	92067 (67.85%)	43620 (32.15%)	4950 (3.65%)	391 (0.29%)	93 (0.07%)	38186 (28.14%)	135687
		Total:	3215613	826074	89102	3553	701	732718	4041687				Total:	837463	620993	69591	3898	883	942185	1458456

## Sheet: Table S2
Table S2. Determination of A6 Exacerbated Pause Sites (EPSs) in RESC13 and RESC14 RNAi.
The number of sequences (norm. count) at each editing stop site for the uninduced samples and each replicate of the RESC13 and RESC14 RNAi induced samples are shown with the associated p and q (padj) values. Sites are considered significantly increased if padj < 0.05 and the norm. count is greater than the average of the uninduced. If an editing stop site is significantly increased in both replic…
A6	RESC13 RNAi							RESC14 RNAi
	Average of WT	Replicate 1			Replicate 2			Average of WT	Replicate 1			Replicate 2
ESS	norm. count	norm. count	p value	padj value	norm. count	p value	padj value	norm. count	norm. count	p value	padj value	norm. count	p value	padj value
24	4902.68	4633.27	0.561207	0.673449	4804.22	0.831832	0.912009	5832.94	4742.4	0.548816	0.617996	3399.87	0.181026	0.246853
25	545.938	465.393	0.301369	0.452054	455.517	0.245957	0.349721	675.89	564.643	0.537508	0.617996	482.344	0.283393	0.364363
26	2738.63	3681.04	0.00824129	0.0285276	3647	0.010878	0.0291147	3184.27	3082.32	0.869708	0.889701	3454.78	0.663371	0.710754
27	865.919	681.894	0.0694014	0.138803	685.903	0.0756938	0.143503	947.856	2233.97	0	0	2807.7	0	0
28	1715.06	1343.15	0.00735133	0.0275293	1246.32	0.000729062	0.00255172	1822.36	1601.61	0.113477	0.19422	1870.6	0.729478	0.772388
29	44.4263	106.839	0	0	123.101	0	0	73.9724	165.083	0.076173	0.173831	171.437	0.0578275	0.156111
30	24.457	70.0125	0	0	77.1184	0	0	28.3712	47.5662	1.0899e-06	6.929e-06	50.5288	1.83e-08	1.179e-07
31	84.6378	305.139	0	0	324.757	0	0	100.987	274.486	2.86e-08	2.311e-07	312.969	0	1e-10
32	189.109	194.655	0.877223	0.936035	216.022	0.453416	0.550145	223.136	1147.49	0	0	1452.19	0	0
33	228.399	362.196	1.91037e-05	0.000156303	421.508	7e-10	7.8e-09	271.596	208.455	0.332915	0.405883	254.191	0.789542	0.826265
34	783.631	1286.49	0	0	1402.45	0	0	961.899	665.099	0.332022	0.405883	721.325	0.431702	0.491812
35	661.33	866.022	0.12518	0.220906	859.289	0.138087	0.251318	799.778	531.352	0.0176266	0.0603371	607.378	0.0889116	0.176477
36	875.238	1936	5.7602e-06	5.18415e-05	2062.48	3.86e-07	2.7017e-06	1135.64	691.68	0.0439293	0.12612	782.94	0.109462	0.185027
37	524.823	872.494	0.0486254	0.109407	853.061	0.0626538	0.124908	607.543	579.2	0.583277	0.617996	677.242	0.177305	0.245499
38	224.731	36.4227	0.173605	0.284081	52.2103	0.212533	0.322342	225.019	29.0993	0.155376	0.222634	25.0066	0.146926	0.220839
39	129.043	19.4254	0.180079	0.289413	17.2439	0.171566	0.273904	129.671	16.2285	0.159781	0.222634	16.2414	0.159829	0.23383
40	213.803	35.208	0.192479	0.298675	22.9915	0.163793	0.272481	214.393	25.4621	0.164917	0.22581	25.5222	0.165052	0.235788
41	1209.57	793.582	0.335646	0.485239	783.608	0.324188	0.415509	1282.17	2157.03	0.00569852	0.0220508	2596.82	3.26115e-05	0.000172649
42	9.37971	7.2845	0.50376	0.621074	9.1009	0.929106	0.989075	8.95823	7.5547	0.698942	0.731834	5.156	0.294767	0.373649
43	559.444	518.399	0.417578	0.560925	489.997	0.170195	0.273904	597.752	394.527	0.00030488	0.00150746	445.737	0.00690963	0.0259111
44	36.8073	38.8494	0.849548	0.921197	50.7719	0.194562	0.303605	42.9501	185.512	0	0	243.879	0	0
45	227.145	255.358	0.34245	0.485239	295.056	0.022306	0.0520472	235.905	430.902	0	0	547.31	0	0
46	1296.07	1708.61	0.430931	0.562585	1843.16	0.296267	0.396488	1755.73	1188.88	0.111225	0.194099	991.241	0.0317121	0.0984168
47	933.376	1897.96	6.81192e-05	0.000360631	2023.69	6.7356e-06	4.08623e-05	1127.39	1195.05	0.578859	0.617996	1327.93	0.0999308	0.179875
48	5464.91	7249.12	0.100796	0.188993	7016.61	0.153535	0.265122	6221.72	9902.32	3.86e-08	2.861e-07	11186	0	0
49	626.167	646.691	0.894433	0.936035	626.994	0.995734	0.995734	714.442	900.13	0.000797441	0.00373538	915.706	0.000277993	0.00131681
50	709.355	597.723	0.191165	0.298675	609.749	0.24348	0.349721	736.287	824.584	0.43128	0.511786	843.007	0.3415	0.4098
51	287.009	231.886	0.0348948	0.087237	202.132	0.00116113	0.00391346	295.432	795.767	0	0	959.533	0	0
52	1644.13	1441.09	0.0758919	0.145325	1504.01	0.2206	0.323992	1642.93	1529.41	0.314732	0.400159	1555.82	0.440445	0.4955
53	376.647	256.571	0.12765	0.220932	264.399	0.154412	0.265122	418.09	737.569	0	0	897.403	0	0
54	1783.93	597.318	3.1336e-05	0.000201446	510.118	7.8404e-06	4.4592e-05	1870.52	3033.93	1.6102e-06	9.554e-06	2543.72	0.0055075	0.0215511
55	1159.82	530.138	3.66404e-05	0.000219842	489.041	1.09706e-05	5.5341e-05	1223.31	1346.71	0.412984	0.496697	1202.64	0.890911	0.921632
56	159.893	283.689	0.00281715	0.0115247	325.715	6.30641e-05	0.000286942	178.437	170.12	0.555826	0.617996	146.173	0.0223105	0.0803177
57	483.402	1901.2	0	0	2417.41	0	0	526.455	811.997	0	0	787.58	0	0
58	6863.41	11442.4	0.0178832	0.0536497	11692.3	0.0125145	0.0325377	7574.49	9669.28	0.159692	0.222634	7434.45	0.925104	0.946129
59	450.817	597.312	0.0328532	0.0869644	708.411	0.000175328	0.000679727	480.929	492.459	0.853974	0.883763	531.584	0.418757	0.487934
60	336.698	322.538	0.804818	0.894242	296.495	0.482933	0.578248	371.318	307.225	0.11618	0.195095	257.027	0.00508758	0.0208128
61	8.66959	8.4987	0.925062	0.956961	10.059	0.444413	0.546508	10.2891	12.0314	0.549283	0.617996	10.0542	0.935639	0.946151
62	17.7934	10.1175	0.0157035	0.0491536	9.101	0.00622587	0.0182759	17.9809	27.7004	0.00100635	0.00447826	20.8818	0.326319	0.407115
63	384.042	201.534	0.0158384	0.0491536	183.93	0.00816117	0.022505	375.009	3412.25	0	0	4097.22	0	0
64	10.2787	4.8563	0.112921	0.203257	6.706	0.296277	0.396488	10.8393	22.3843	6.63e-08	4.541e-07	26.8112	0	0
65	272.93	106.027	2.58605e-05	0.000193954	97.2328	9.4743e-06	5.07155e-05	291.997	974.288	0	0	1064.2	0	0
66	3326.47	1564.51	0.0321359	0.0869644	1420.66	0.020468	0.0490155	3370.87	1939.06	0.0532984	0.139516	2167.07	0.104215	0.180372
67	165.29	97.9345	3.3073e-06	3.30732e-05	73.7637	3e-10	3.4e-09	157.253	108.285	0.0386618	0.118652	105.956	0.0303025	0.0974008
68	312.806	236.743	0.00764703	0.0275293	205.964	0.000179269	0.000679727	311.382	1064.67	0	0	1185.88	0	0
69	1582.56	759.197	7.347e-07	9.4463e-06	658.13	2.7e-08	2.234e-07	1470.12	993.87	0.155773	0.222634	1157.27	0.351106	0.415783
70	209.008	125.454	0.00310813	0.0121622	125.017	0.00295563	0.00960579	201.342	178.516	0.563927	0.617996	203.147	0.963613	0.963613
71	93.0559	69.2023	0.052512	0.11527	98.6724	0.648011	0.719135	89.5009	65.4745	0.160096	0.222634	75.7933	0.422876	0.487934
72	168.436	50.5862	0.0633403	0.12956	46.9412	0.0555915	0.114973	172.239	38.0532	0.0187687	0.0618672	44.0838	0.0248019	0.0826729
73	4695.66	5850.14	0.0341097	0.087237	6280.91	0.00362186	0.0113651	3965.95	1013.74	0.0420676	0.124801	1045.12	0.0443003	0.128614
74	9316.62	11865	0.591427	0.700374	12536.9	0.497582	0.580512	7092.46	2291.04	7.8598e-06	4.372e-05	2544.23	2.30275e-05	0.00012953
75	2976.38	1075.25	1.9914e-06	2.24038e-05	973.778	5.498e-07	3.5739e-06	3629.63	2592.68	0.159695	0.222634	2925.52	0.339692	0.4098
76	179.363	117.36	2.87207e-05	0.000198836	89.5708	1.4e-09	1.25e-08	191.622	110.803	0.00192311	0.00815035	133.025	0.0245147	0.0826729
77	12.8132	1.2141	0.171769	0.284081	0.479	0.146183	0.260837	27.0342	26.0214	0.95369	0.964527	39.4434	0.476753	0.529726
78	5.43761	2.4282	0.000233724	0.00110711	0.479	1.3e-09	1.25e-08	4.90744	3.9172	0.28509	0.373132	3.6092	0.161083	0.23383
79	302.559	138.404	0.00990405	0.0330135	121.664	0.00448055	0.013591	301.839	448.527	0.0146341	0.0520974	488.015	0.00194497	0.00875237
80	758.94	238.358	6.5e-09	9.71e-08	183.449	1e-10	2.1e-09	670.206	676.013	0.974213	0.974213	749.168	0.66026	0.710754
81	2.90684	0	0	0	0.958	9.19e-08	6.968e-07	4.90341	6.995	0.570128	0.617996	11.8588	0.0589753	0.156111
82	6.55039	2.4282	0.0732338	0.143284	3.353	0.164686	0.272481	6.19644	10.9122	0.0076333	0.0283068	15.9836	3.08e-08	1.847e-07
83	171.179	69.201	8.96084e-05	0.000448042	56.9992	1.15547e-05	5.5341e-05	163.392	199.782	0.323514	0.405532	203.662	0.274596	0.358168
84	222.452	201.13	0.486266	0.607832	167.645	0.073502	0.142312	203.376	124.793	0.175515	0.236679	124.002	0.17121	0.240764
85	2.46024	4.047	0.28611	0.436439	3.832	0.356445	0.450507	2.31421	8.6739	3.30178e-05	0.000172858	8.5074	5.2795e-05	0.000263975
86	8.70916	6.0705	0.169724	0.284081	5.748	0.123338	0.229056	8.22117	14.8294	0.00527128	0.0213247	14.9524	0.00448455	0.0192195
87	127.121	69.6056	0.112001	0.203257	59.8728	0.0631405	0.124908	123.519	92.6157	0.439793	0.51502	99.2531	0.544106	0.59719
88	469.33	397.809	0.442594	0.56905	373.609	0.30413	0.401099	420.82	79.1849	0.0493837	0.137348	75.7933	0.0471696	0.132664
89	420.504	214.078	0.04567	0.105392	180.097	0.0199441	0.0490155	389.794	151.375	0.119055	0.196221	150.04	0.117002	0.188039
90	1126.4	643.45	0.0579547	0.124189	550.351	0.0237255	0.0539754	1040.41	265.536	0.0515402	0.139002	304.72	0.06453	0.161325
91	194.823	56.6566	0.0417992	0.0989981	49.336	0.0320839	0.0695152	185.821	41.4112	0.081216	0.17438	47.1774	0.0941208	0.176477
92	385.009	135.975	0.0601873	0.125973	127.89	0.0523266	0.110738	355.414	53.4428	0.0963216	0.179787	54.6536	0.0976639	0.179383
93	700.987	600.555	0.431315	0.562585	567.597	0.295935	0.396488	641.204	219.368	0.0629295	0.160021	240.786	0.0775187	0.176477
94	101.703	118.574	0.323319	0.477028	122.621	0.220742	0.323992	90.1071	52.6037	0.290808	0.3751	46.1463	0.215629	0.289651
95	154.577	115.741	0.0233933	0.0657936	113.999	0.0178536	0.0451299	133.297	41.9708	0.0792358	0.17438	48.2087	0.101996	0.179992
96	1344.76	1258.97	0.674621	0.788518	1237.2	0.598672	0.672582	1174.15	136.546	0.0336849	0.10707	131.994	0.0329132	0.0987396
97	7845.6	3780.16	0.000404065	0.00173171	3267.14	6.78213e-05	0.000293892	6534.43	562.69	0.0743278	0.173831	524.366	0.0724877	0.172398
98	312.839	168.755	0.0370537	0.0901305	159.024	0.026014	0.0577384	219.684	30.2189	0.106226	0.189082	33.7718	0.112943	0.185027
99	381.857	288.543	0.35357	0.489559	267.755	0.256646	0.359304	260.247	42.8103	0.0660923	0.163395	40.7324	0.0635449	0.161325
100	511.886	653.566	0.345059	0.485239	705.541	0.196843	0.303605	323.636	27.4209	0.105083	0.189082	34.0296	0.113072	0.185027
101	179.217	191.821	0.777098	0.874235	186.804	0.864691	0.936749	116.659	8.6739	0.0880437	0.17438	7.2184	0.0838447	0.176477
102	2393.85	3367.76	0.359271	0.489915	3324.11	0.381211	0.475209	1348.39	62.1169	0.0940661	0.179787	58.5206	0.0931502	0.176477
103	4.50781	12.141	0.0201923	0.0586229	13.412	0.00673814	0.0191616	2.71358	0	0	0	0.2578	0.0894912	0.176477
104	337.313	702.527	0.000274661	0.00123597	711.762	0.000191411	0.000696737	218.486	12.0317	0.0849021	0.17438	15.468	0.0902182	0.176477
105	26.0163	49.7763	3.92577e-05	0.000220825	47.8983	0.000152596	0.000631191	17.8134	3.0778	0.149691	0.222634	2.3202	0.129851	0.205028
106	2250.42	1736.49	0.475338	0.602541	1755.46	0.491782	0.580512	1409.04	123.674	0.085027	0.17438	111.112	0.0820231	0.176477
107	18.198	14.1642	0.741853	0.845149	18.6804	0.96858	0.989075	9.03359	0.8394	0.135323	0.211293	2.578	0.239368	0.316811
108	80.2264	51.7995	0.516481	0.628153	51.2508	0.508418	0.585647	42.4365	16.2288	0.247595	0.328895	20.3662	0.330216	0.407115
109	66.5951	52.2039	0.687527	0.793301	47.4189	0.591995	0.672582	36.3628	3.0779	0.0881698	0.17438	3.6092	0.0933638	0.176477
110	309.571	321.724	0.966097	0.988054	301.759	0.978206	0.989075	107.997	11.472	0.13268	0.210867	14.9524	0.147226	0.220839
111	78.5562	78.5089	0.999616	0.999616	81.427	0.976738	0.989075	17.1523	2.2384	0.0748376	0.173831	2.578	0.0817023	0.176477
112	256.121	299.868	0.888743	0.936035	276.37	0.948371	0.989075	58.6163	10.3528	0.0969637	0.179787	6.445	0.0727904	0.172398
113	26.7933	26.7091	0.997934	0.999616	25.865	0.977224	0.989075	6.01606	0.2798	0.130141	0.210592	0.5156	0.146688	0.220839
114	1.58597	2.0234	0.844237	0.921197	3.8318	0.313093	0.407021		0	0	0	0	0	0

## Sheet: Table S3
Table S3. Determination of COIII Exacerbated Pause Sites (EPSs) in RESC13 and RESC14 RNAi.
The number of sequences (norm. count) at each editing stop site for the uninduced samples and each replicate of the RESC13 and RESC14 RNAi induced samples are shown with the associated p and q (padj). Sites are considered significantly increased if padj < 0.05 and the norm. count is greater than the average of the uninduced. If an editing stop site is significantly increased in both replicates, t…
COIII	RESC13 RNAi							RESC14 RNAi
	Average of WT	Replicate 1			Replicate 2			Average of WT	Replicate 1			Replicate 2
ESS	norm. count	norm. count	p value	padj value	norm. count	p value	padj value	norm. count	norm. count	p value	padj value	norm. count	p value	padj value
10	2853.13	7532.3	0	0	8270.06	0	0	3730.22	15249.2	0	0	16858.7	0	0
11	959.253	1074.95	0.588256	0.696441	1154.21	0.361659	0.459575	1516.6	3406.87	0.0116579	0.0205495	3529.83	0.00722223	0.0138889
12	65.0727	101.948	0.0467463	0.0962974	130.587	0.000410899	0.0015262	100.837	297.779	5.8811e-06	2.5485e-05	286.777	1.88984e-05	6.29947e-05
13	13.8758	68.5667	0	0	83.8506	0	0	17.0596	107.135	0	0	102.144	0	0
14	260.487	1160.18	0	0	1207.36	0	0	354.455	3792	0	0	4004.9	0	0
15	576.177	2047.95	0	0	2321.24	0	0	720.279	1722.06	3.8472e-06	1.90527e-05	1784.26	9.281e-07	4.0351e-06
16	110.4	328.837	0	0	329.447	0	0	128.231	711.695	0	0	695.745	0	0
17	11.3801	41.0498	0	0	45.3618	0	0	12.9068	47.0307	0	0	45.2813	0	0
18	151.033	195.773	0.318475	0.437372	198.859	0.286242	0.407796	379.497	953.712	0.154805	0.189408	1350.37	0.0161461	0.0293566
19	636.465	2267.65	0	0	2364.31	0	0	711.331	638.449	0.744587	0.790174	675.341	0.872192	0.889992
20	18735	15006.6	0.146384	0.259958	15098.6	0.156608	0.246776	18891	8560.51	3.09296e-05	0.000110205	9654.24	0.000195015	0.000525254
21	8743.61	18220.5	0	0	18333.1	0	0	8734.91	9597.31	0.000481552	0.00111292	8167.67	0.0216724	0.0350623
22	188.121	392.905	0	0	466.448	0	0	189.634	272.542	0.000186538	0.000510526	255.187	0.00313266	0.00681014
23	105.668	214.722	0	0	230.933	0	0	97.4041	129.161	3.71974e-05	0.000124791	131.63	8.7926e-06	3.14023e-05
24	423.125	846.699	4.44e-08	2.404e-07	968.177	0	0	390.415	480.646	0.0207892	0.0343186	481.256	0.019943	0.0337092
25	7609.95	11361.7	0	1e-10	11881.1	0	0	7780.57	6542.79	1.21094e-05	4.84377e-05	6041.74	8e-10	4.4e-09
26	355.765	586.878	0.000260592	0.00111838	603.449	9.09886e-05	0.000378513	357.598	267.953	0.140847	0.176483	242.901	0.059539	0.0815603
27	430.052	486.729	0.341718	0.463118	577.332	0.0134864	0.0304911	509.682	727.268	0.00791408	0.0144397	699.938	0.0202255	0.0337092
28	152.968	228.252	0.0225526	0.0527936	256.134	0.00177381	0.00542576	150.376	218.409	0.0182816	0.0306659	206.05	0.0534599	0.0752956
29	157.916	221.937	2.7e-09	1.55e-08	220.853	5e-09	2.73e-08	150.26	319.587	0	0	326.452	0	0
30	2748.63	2603.24	0.000493954	0.00188434	2409.22	0	0	2597.25	1268.94	1.05022e-05	4.36891e-05	1173.82	2.3341e-06	9.3363e-06
31	913.061	961.271	0.693574	0.785034	959.014	0.707246	0.766183	942.73	729.564	0.00495026	0.00971371	735.746	0.0063574	0.0124655
32	2370.57	2569.85	0.431459	0.529051	2524.68	0.54293	0.641644	2264.96	2587.93	0.1085	0.141741	1984.01	0.162662	0.193645
33	202.144	192.616	0.791338	0.840287	184.196	0.618236	0.691048	190.969	350.335	0	0	335.583	0	0
34	100.565	62.7016	0.0147661	0.036212	58.1915	0.00636278	0.0161397	92.86	124.347	4.0344e-06	1.90719e-05	85.6492	0.291142	0.338537
35	116.936	48.7162	0.0326955	0.0716518	37.5726	0.0129666	0.0299673	97.3926	118.844	0.0224187	0.0364304	84.2472	0.161767	0.193645
36	45.7177	18.4943	0.000929489	0.0030883	16.9534	0.000467962	0.00167821	43.0731	71.1217	3.4e-09	2.19e-08	56.8662	0.00364421	0.00775364
37	95.1221	65.408	0.210289	0.349351	54.5258	0.0869754	0.160685	98.8438	116.319	0.56141	0.614597	106.01	0.811766	0.836872
38	43.7588	33.8319	0.381857	0.485571	34.365	0.407944	0.511158	45.6057	68.5987	0.0934386	0.124585	53.0047	0.589321	0.640566
39	6.47177	8.5709	0.214201	0.350202	9.164	0.11115	0.189502	6.94314	10.3236	0.0720536	0.102652	6.6691	0.884062	0.892992
40	425.307	139.385	0.00996617	0.0256629	101.721	0.00354022	0.00995089	458.067	402.879	0.776442	0.815657	255.199	0.296574	0.340889
41	307.664	124.046	0.0584612	0.111509	122.34	0.0561577	0.108156	336.491	273.938	0.725862	0.778244	157.613	0.316015	0.359108
42	1078.53	578.287	0.450101	0.545416	464.157	0.353638	0.459575	1276.92	1409.38	0.907863	0.925664	829.129	0.6956	0.740125
43	107.873	35.6363	0.306351	0.426407	23.8264	0.23399	0.347642	136.955	122.97	0.921261	0.930205	56.1636	0.567986	0.62416
44	6.93784	5.4132	0.189929	0.320699	7.3312	0.735225	0.788283	7.85127	6.6528	0.679461	0.736083	3.8611	0.168915	0.198724
45	11.6922	12.6306	0.760781	0.816255	11.455	0.938653	0.959778	16.7402	19.2709	0.829913	0.863109	8.7751	0.498976	0.554418
46	136.103	129.459	0.832082	0.874535	118.674	0.578089	0.660674	155.943	394.166	0.000333015	0.000824608	299.783	0.030269	0.0465676
47	2357.22	1168.31	1.1485e-05	5.91479e-05	1231.19	3.25119e-05	0.00014701	2361.49	856.666	3.23e-08	1.975e-07	660.622	4e-10	2.4e-09
48	15.3834	28.4191	0.00374488	0.0104249	37.5724	8.04e-07	3.9816e-06	17.5923	10.3236	0.293411	0.350745	6.669	0.114353	0.141842
49	942.808	1024.41	0.644938	0.746389	1137.25	0.272203	0.393182	973.679	423.513	1.47494e-05	5.68125e-05	336.98	5.336e-07	2.4254e-06
50	1909.34	1162	0.000523566	0.00192597	1056.61	7.57344e-05	0.000328182	2115.14	451.034	0	2e-10	352.771	0	0
51	6195.09	4796.31	0.298212	0.420765	4153.14	0.128863	0.212726	6315.99	3026.86	0.0348243	0.0532607	2447.02	0.0130487	0.0241643
52	29.7831	14.4349	0.0876324	0.164112	12.8296	0.0592051	0.111951	26.7257	11.9295	9.87312e-05	0.000285223	13.6898	0.000602566	0.00146967
53	942.747	1615.27	0.00636728	0.0168161	1456.63	0.0371003	0.0787436	1239.67	1982.32	0.331849	0.392186	1331.48	0.904508	0.904508
54	5486.27	1099.77	0.0110808	0.027837	892.115	0.00780505	0.0193268	4875.28	227.117	0.0919969	0.124256	203.234	0.0903386	0.118867
55	342.28	137.134	0.000805439	0.00276534	147.999	0.00150639	0.00489576	311.675	37.3939	0.0146667	0.0250055	42.8229	0.0167477	0.0299066
56	13046	4800.8	0	0	4062.87	0	0	12043.3	3867.7	5.973e-07	3.4513e-06	3547.13	2.128e-07	1.0132e-06
57	283.688	72.6266	0.00207213	0.00646757	67.3554	0.00159615	0.0050303	243.765	235.838	0.9528	0.9528	207.448	0.786238	0.818998
58	222.641	198.027	0.0223992	0.0527936	194.277	0.00850243	0.020564	216.819	138.345	7.79927e-05	0.000238566	112.328	1.439e-07	7.194e-07
59	43.9323	22.1028	0.00213743	0.00647514	27.9502	0.024578	0.0532524	41.4361	18.8122	0.00629888	0.0116979	15.0938	0.00146872	0.00341563
60	51.031	28.8693	0.00257265	0.00757095	30.6994	0.00567983	0.0151462	48.6051	23.6303	4.3985e-06	1.9889e-05	16.1465	2.4e-09	1.27e-08
61	154.448	105.104	2.29517e-05	0.000112573	102.637	8.7572e-06	4.13978e-05	150.37	52.7658	0	1e-10	52.6527	0	1e-10
62	59.6793	48.2671	0.249118	0.372312	49.9439	0.32553	0.451401	56.8875	22.7135	4.83285e-05	0.000157068	16.1473	1.2703e-06	5.293e-06
63	177.693	60.8977	0.0537518	0.104461	77.4359	0.0977806	0.169486	180.019	22.4834	0.00549251	0.0103858	20.0081	0.00479846	0.00979277
64	73.5399	59.9953	0.0435575	0.0934672	50.8602	0.000725974	0.00251671	68.723	33.2672	0.00363484	0.00726968	23.1677	0.000186503	0.000518064
65	472.627	356.363	0.00565483	0.0153276	367.018	0.0119522	0.0282507	434.992	131.458	0.000903518	0.00199927	97.2318	0.000221447	0.000567813
66	634.223	713.179	0.0452987	0.0952197	784.897	0.000133322	0.000533287	586.669	211.072	0.000111546	0.000313533	157.609	1.01478e-05	3.49925e-05
67	6.01241	5.8643	0.951887	0.954812	9.6222	0.141424	0.229814	5.88814	1.147	0.0751498	0.105616	2.106	0.155725	0.189909
68	11.3876	4.9621	0.158794	0.277216	10.5386	0.852294	0.895339	11.6025	7.5706	0.361536	0.417775	4.5632	0.111151	0.141227
69	4.82754	4.0599	0.606524	0.709909	3.6656	0.435631	0.533007	4.55666	1.8352	0.109032	0.141741	1.053	0.0390966	0.0566618
70	2096.18	1821.96	0.745726	0.808524	1905.65	0.821742	0.872053	1664.7	894.279	3.179e-05	0.000110205	905.976	4.18388e-05	0.000134109
71	544.273	622.512	0.355748	0.475871	718	0.0403071	0.0838388	583.055	270.709	0.0346559	0.0532607	256.24	0.0270905	0.042329
72	6.7309	8.1198	0.587604	0.696441	6.873	0.955752	0.964096	6.56639	1.6058	0.0282706	0.045233	2.808	0.0965304	0.125364
73	193.764	231.412	0.366888	0.478347	252.01	0.162717	0.252575	193.097	120.671	0.0800434	0.110994	88.8055	0.0117157	0.0221051
74	12.0926	75.3332	0	0	97.5966	0	0	9.3745	5.0472	0.148378	0.183706	3.1592	0.0379068	0.0557454
75	5.8169	27.066	0	0	30.6994	0	0	4.90141	2.9822	0.336203	0.392866	1.7551	0.114892	0.141842
76	41.1334	62.7022	0.291164	0.416526	75.603	0.0916161	0.161493	34.0956	58.274	0.00504463	0.00971558	49.4943	0.0741128	0.100152
77	96.8068	121.345	0.264334	0.383471	158.995	0.00467087	0.0127834	82.7123	58.0441	2.2933e-06	1.19249e-05	47.3878	0	1e-10
78	8.90239	52.7782	0	0	82.9342	0	0	6.39247	6.194	0.899339	0.925664	4.9142	0.3461	0.388876
79	24.4751	29.3211	0.364415	0.478347	34.8232	0.0527751	0.107048	20.1631	16.7481	0.419581	0.479521	11.5837	0.0425831	0.060833
80	86.4325	144.35	0	0	198.859	0	0	75.3821	22.7122	0.000252789	0.000657251	16.4976	4.2915e-05	0.000134109
81	760.948	9.022	0.145389	0.259958	14.2042	0.148184	0.237094	956.42	125.716	2.84389e-05	0.00010563	157.251	5.65586e-05	0.000166349
82	435.442	215.618	0.000668609	0.00237471	223.602	0.00104331	0.00350015	350.07	40.148	0.00120988	0.00262142	42.4733	0.00131697	0.00313564
83	91.3396	45.5595	0.000396097	0.00156915	61.8571	0.0225195	0.0498304	81.4299	22.0247	0.00029674	0.000752706	15.7958	6.40132e-05	0.000182895
84	108.784	43.3048	0.0488773	0.098713	44.9036	0.0546603	0.107258	86.2213	22.0237	0	1e-10	23.518	0	2e-10
85	43.3195	14.8861	0.000322154	0.00132727	21.5354	0.00585719	0.0152287	35.9879	13.5355	0.000518519	0.0011723	6.6693	5.8296e-06	2.15913e-05
86	40.718	14.4347	1e-10	9e-10	17.8698	2.47e-08	1.285e-07	35.5155	9.406	0.000230062	0.000613498	6.6691	4.70923e-05	0.000142704
87	25.1647	16.2393	0.423937	0.526091	19.7026	0.624601	0.691048	19.2514	9.6354	0.0435964	0.0638595	10.1794	0.0569375	0.0790798
88	165.502	204.796	0.659273	0.754501	249.261	0.347291	0.459575	129.552	27.7589	0.000443681	0.0010487	24.2195	0.000278224	0.000695559
89	370.869	378.466	0.954812	0.954812	494.398	0.356888	0.459575	294.52	99.1056	0	0	96.8784	0	0
90	432.922	418.156	0.952154	0.954812	566.794	0.586453	0.662947	297.509	23.1707	0	0	20.3589	0	0
91	263.166	240.433	0.930625	0.954812	274.92	0.964096	0.964096	124.269	37.3939	0.000399735	0.0009668	32.9948	0.000199596	0.000525254
92	337.971	264.788	0.726449	0.796003	322.573	0.941321	0.959778	231.965	98.4203	9.54027e-05	0.000283482	72.66	3.2449e-06	1.24803e-05
93	414.492	271.554	0.251028	0.372312	326.239	0.478504	0.572004	335.035	85.3449	0	0	72.3107	0	0
94	31.4066	11.7285	0.000235036	0.00105255	21.0772	0.0535241	0.107048	26.8456	8.4884	0.00290557	0.00604358	9.8288	0.00577764	0.0115553
95	2.77692	0.4511	0.0305781	0.0684684	1.3746	0.192282	0.294078	2.32965	0.2294	0.0116073	0.0205495	0	0	0
96	5.66493	6.3154	0.708445	0.79315	5.9566	0.866837	0.901511	4.37609	2.9823	0.529035	0.585316	3.5101	0.695718	0.740125
97	18.3173	12.1793	0.0516631	0.102333	16.4952	0.563491	0.651145	14.7392	28.4494	5.25259e-05	0.000165536	24.5722	0.00372639	0.00776332
98	191.88	111.869	0.240996	0.372312	128.296	0.351455	0.459575	157.194	43.82	0	0	37.2084	0	0
99	181.639	105.552	0.411196	0.516502	92.5567	0.335972	0.459575	151.927	60.7988	0.0326114	0.0513877	54.0577	0.0217386	0.0350623
100	18.4092	7.2174	0.171074	0.293676	11.9132	0.426926	0.528575	13.9884	4.1294	0.00223054	0.0047342	6.6692	0.0232084	0.0368388
101	47.7598	18.0431	0.0019808	0.00637568	19.2445	0.00299698	0.00865793	37.2618	19.7312	0.114209	0.146639	14.0413	0.0364181	0.0543553
102	27.2982	12.1791	0.244661	0.372312	10.9968	0.209699	0.316068	18.3709	6.6536	0.0126895	0.0219951	4.2123	0.0025983	0.00577401
103	2.99486	0.4511	0.253027	0.372312	1.3746	0.466579	0.564236	1.71379	2.2942	0.48315	0.540297	1.404	0.708198	0.745472
104	3.66271	1.3533	0.250323	0.372312	1.8328	0.362357	0.459575	2.61899	0.9176	0.440067	0.497467	0	0	0
105	15.5856	9.0215	0.0300459	0.0684684	6.4148	0.00243731	0.0072423	12.5016	8.0301	0.255661	0.309172	4.2124	0.0350998	0.0531815
106	104.583	48.7162	0.00367429	0.0104249	71.9375	0.0896128	0.160685	78.8203	17.666	0.0363472	0.0547842	9.1265	0.0170657	0.0299399
107	221.681	111.865	0.238741	0.372312	127.38	0.311686	0.438046	146.917	31.6614	0.00325388	0.00663536	24.9231	0.00184121	0.00418458
108	128.191	51.8735	5.08645e-05	0.000238138	57.7334	0.000183637	0.000707342	98.2141	5.5063	0.0878448	0.120209	3.8612	0.0823578	0.10981
109	15.0446	13.9834	0.871499	0.906712	7.3312	0.23969	0.351096	9.40189	2.0647	0.0500978	0.0723634	0.702	0.0201798	0.0337092
